# Supplementary material
Source: publisher figshare collection journal article supplement (https://gsajournals.figshare.com/ndownloader/files/22007685)
Supplement: Supplementary file 1 [file 22007685]

## Sheet: Sheet1
Table S7. General statistics of multiple assemblers used in this study
Metric	Genotype	FALCON-Unzip	Canu	wtdbg2
Haploid assembly size (Mb)	P. megakarya Pm1	207	172*	193
Number of contigs	P. megakarya Pm1	1163	2205	2729
Maximum contig length (Mb)	P. megakarya Pm1	3.4	4.7	1.6
N50 length (Kb)	P. megakarya Pm1	337	310	180
Haploid assembly size (Mb)	P. palmivora Pp2	113	91*	112
Number of contigs	P. palmivora Pp2	484	886	2358
Maximum contig length (Mb)	P. palmivora Pp2	2.5	3.2	1
N50 length (Kb)	P. palmivora Pp2	404	151	105
*Half of contig size
